# Supplementary material for: Tobacco smoking and all-cause mortality in a large Australian cohort study: findings from a mature epidemic with current low smoking prevalence
Source: Springer Nature journal article supplement (doi:10.1186/s12916-015-0281-z), 2015-02-23
Supplement: MOESM1 [file 9758714]

**Supplementary Table 1: Smoking patterns at re-survey, by smoking status reported at baseline**

|                                            | Never smoker at recruitment | Ex-smoker at recruitment | Current smoker at recruitment, by cigarettes per day |                    |                    |                        |
|--------------------------------------------|-----------------------------|--------------------------|------------------------------------------------------|--------------------|--------------------|------------------------|
|                                            |                             |                          | ≤14                                                  | 15-24              | ≥25                | All amounts*           |
| <b>MEN</b>                                 |                             |                          |                                                      |                    |                    |                        |
| Current smoker at re-survey (%)            | 0.3%<br>(47/13,790)         | 1.9%<br>(237/12,483)     | 59.1%<br>(296/501)                                   | 67.0%<br>(377/563) | 73.0%<br>(359/492) | 66.1%<br>(1,043/1,579) |
| Cigarettes smoked per day at resurvey (SD) | 5.8 (9.6)                   | 21.2 (14.8)              | 11.0 (5.6)                                           | 19.6 (7.4)         | 29.7 (11.2)        | 20.4 (11.3)            |
| <b>WOMEN</b>                               |                             |                          |                                                      |                    |                    |                        |
| Current smoker at re-survey (%)            | 0.3%<br>(66/21,010)         | 2.2%<br>(205/9,240)      | 65.2%<br>(445/682)                                   | 73.2%<br>(525/717) | 75.6%<br>(298/394) | 70.5%<br>(1,284/1,820) |
| Cigarettes smoked per day at resurvey (SD) | 3.4 (5.4)                   | 15.4 (10.6)              | 10.1 (5.0)                                           | 17.7 (6.3)         | 27.1 (8.9)         | 16.9 (9.2)             |

SD=standard deviation

\*Numbers do not sum to total due to missing values
