# Supplementary material for: Tobacco smoking and all-cause mortality in a large Australian cohort study: findings from a mature epidemic with current low smoking prevalence
Source: Springer Nature journal article supplement (doi:10.1186/s12916-015-0281-z), 2015-02-23
Supplement: MOESM2 [file 9758714]

**Supplementary Table 2: Smoking habits among current and former smokers by sex and birth decade**

| Birth decade                    | MEN     |         |         |         |         | WOMEN   |         |         |         |         |
|---------------------------------|---------|---------|---------|---------|---------|---------|---------|---------|---------|---------|
|                                 | 1920-9  | 1930-9  | 1940-9  | 1950-9  | 1960-9  | 1920-9  | 1930-9  | 1940-9  | 1950-9  | 1960-9  |
| Current Smokers                 |         |         |         |         |         |         |         |         |         |         |
| n                               | 227     | 691     | 2161    | 3613    | 915     | 182     | 487     | 2057    | 4140    | 1261    |
| Age at starting smoking (years) | 18 ± 5  | 18 ± 6  | 18 ± 6  | 17 ± 5  | 17 ± 5  | 24 ± 12 | 23 ± 9  | 20 ± 6  | 18 ± 5  | 17 ± 5  |
| Cigarettes/day                  | 14 ± 8  | 19 ± 12 | 20 ± 10 | 19 ± 10 | 18 ± 9  | 14 ± 10 | 16 ± 8  | 17 ± 9  | 17 ± 9  | 16 ± 8  |
| Smoking duration (years)        | 63 ± 5  | 54 ± 6  | 45 ± 6  | 36 ± 6  | 30 ± 5  | 58 ± 12 | 50 ± 9  | 43 ± 6  | 34 ± 6  | 30 ± 5  |
| Former Smokers                  |         |         |         |         |         |         |         |         |         |         |
| n                               | 3928    | 7049    | 12356   | 11469   | 2167    | 1878    | 3882    | 9893    | 13242   | 3502    |
| Age at starting smoking (years) | 18 ± 4  | 18 ± 4  | 17 ± 4  | 17 ± 4  | 17 ± 4  | 22 ± 7  | 21 ± 6  | 19 ± 5  | 18 ± 4  | 17 ± 4  |
| Cigarettes/day                  | 18 ± 14 | 21 ± 15 | 21 ± 14 | 19 ± 12 | 18 ± 12 | 12 ± 9  | 14 ± 11 | 16 ± 11 | 15 ± 10 | 15 ± 10 |
| Smoking duration (years)        | 29 ± 15 | 27 ± 14 | 23 ± 12 | 18 ± 10 | 16 ± 9  | 29 ± 15 | 26 ± 13 | 22 ± 12 | 17 ± 10 | 15 ± 9  |
| Age at ceasing smoking (years)  | 48 ± 14 | 45 ± 13 | 40 ± 12 | 36 ± 10 | 34 ± 8  | 50 ± 15 | 47 ± 13 | 41 ± 12 | 34 ± 10 | 32 ± 8  |

Data are mean ± standard deviation. There were 34 current smokers (18 men and 16 women) and 534 former smoker (366 men and 168 women) born before 1920, who are not included in this table.
