# Supplementary material for: Tobacco smoking and all-cause mortality in a large Australian cohort study: findings from a mature epidemic with current low smoking prevalence
Source: Springer Nature journal article supplement (doi:10.1186/s12916-015-0281-z), 2015-02-23

**MEN**

**WOMEN**

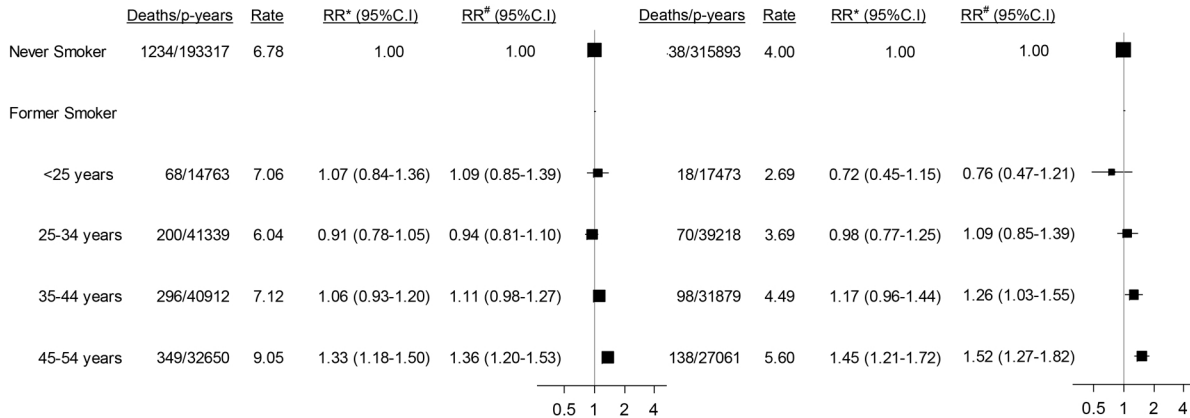

Supplement: MOESM4 [file 9758714]
