# Supplementary figures and images for: Tobacco smoking and all-cause mortality in a large Australian cohort study: findings from a mature epidemic with current low smoking prevalence
Source: Springer Nature journal article supplement (doi:10.1186/s12916-015-0281-z), 2015-02-23

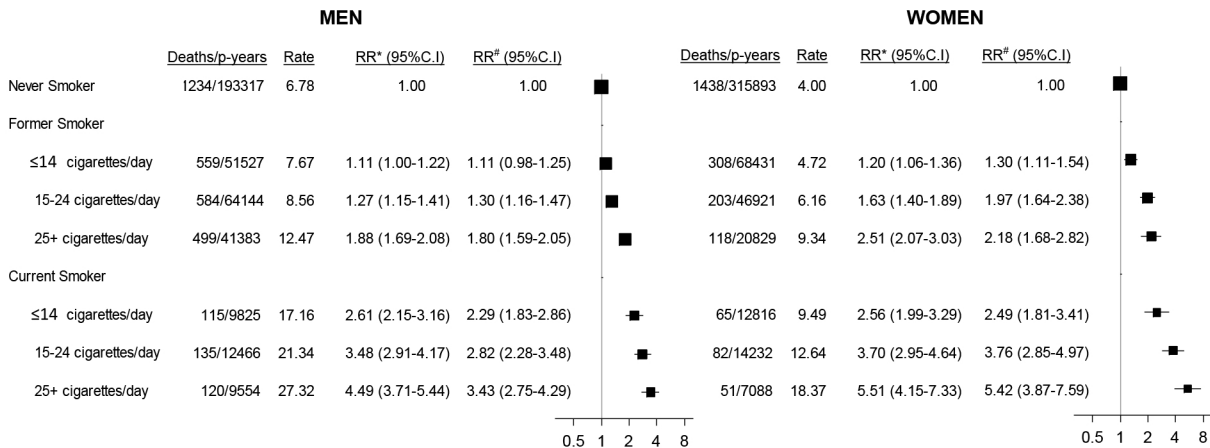

Supplement: MOESM3 [file 9758714]
